# Supplementary material for: Organic matrix-induced formation of a discrete cyclic [Cl2(H2O)2]2−cluster
Source: Royal Society of Chemistry journal article supplement (doi:10.1039/c7nj00700k), 2017-01-01
Supplement: c7nj00700k1.pdf [file c7nj00700k1.pdf]

## Electronic Supplementary Information

### Organic matrix-induced formation of a discrete cyclic $[\text{Cl}_2(\text{H}_2\text{O})_2]^{2-}$ -cluster

Damir A. Safin, Maria G. Babashkina, Koen Robeyns and Yann Garcia\*

*Institute of Condensed Matter and Nanosciences, Molecules, Solids and Reactivity (IMCN/MOST), Université catholique de Louvain, Place L. Pasteur 1, 1348 Louvain-la-Neuve, Belgium. E-mail: yann.garcia@uclouvain.be*

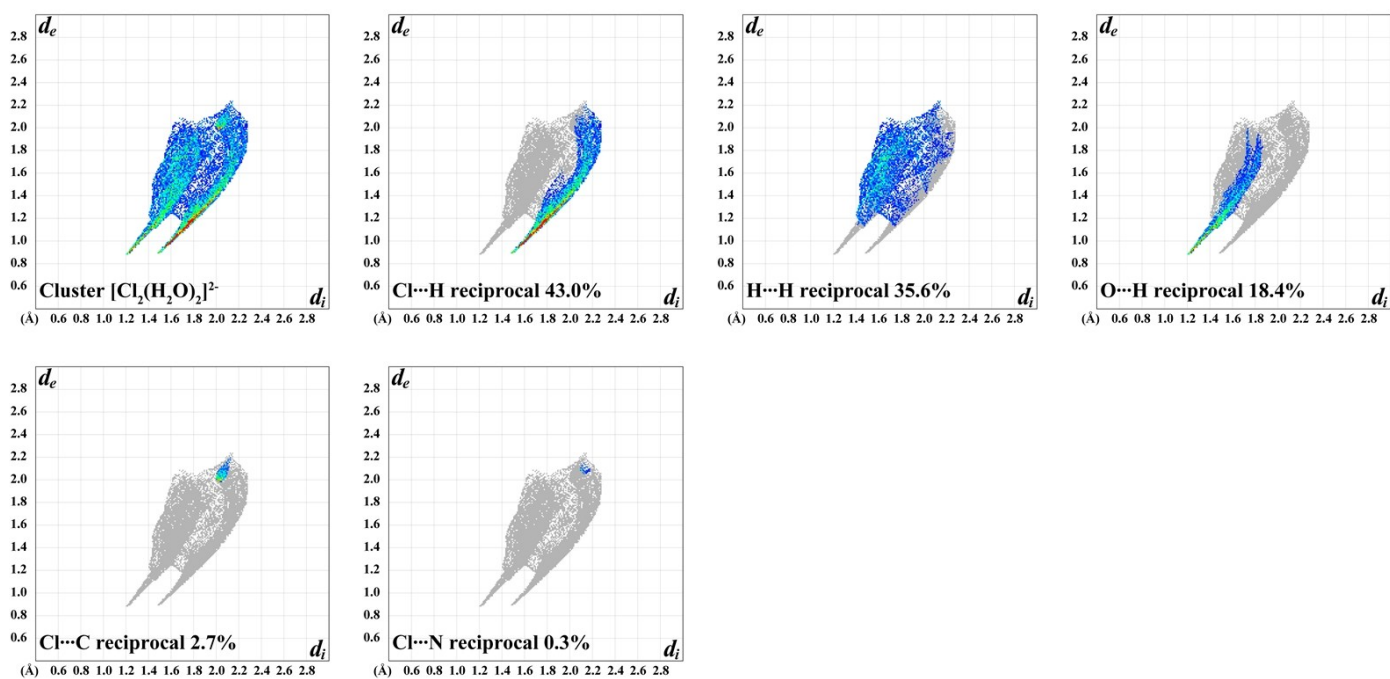

**Fig. S1** 2D fingerprint plots and decomposed 2D fingerprint plots of observed contacts for the  $[\text{Cl}_2(\text{H}_2\text{O})_2]^{2-}$  cluster in the structure of **1**.

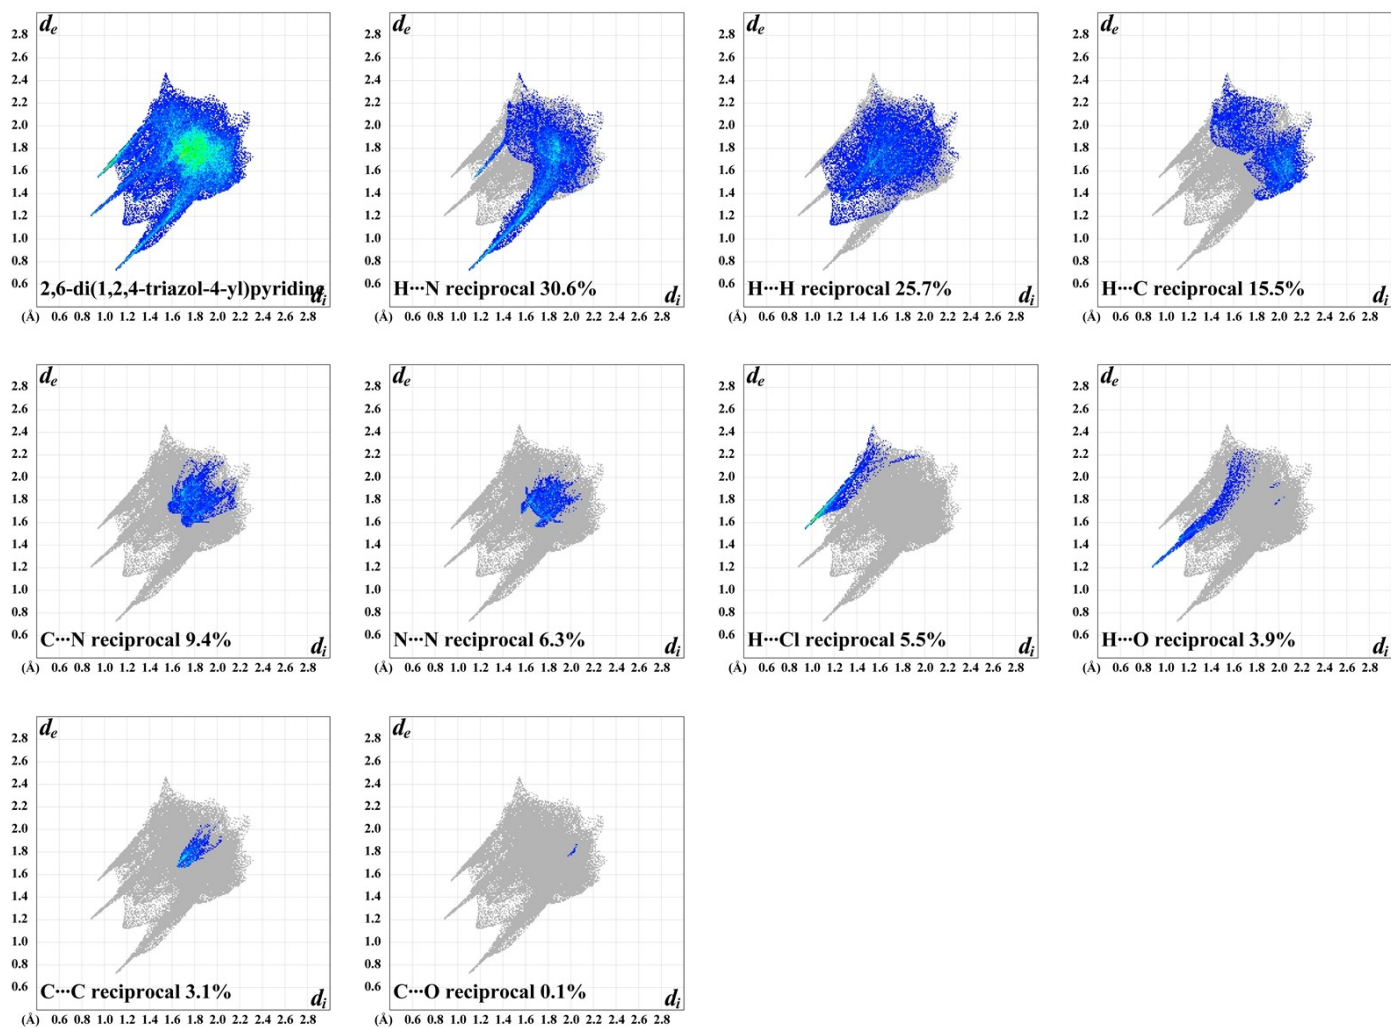

**Fig. S2** 2D fingerprint plots and decomposed 2D fingerprint plots of observed contacts for the 2,6-di(4H-1,2,4-triazol-4-yl)pyridine in the structure of **1**.

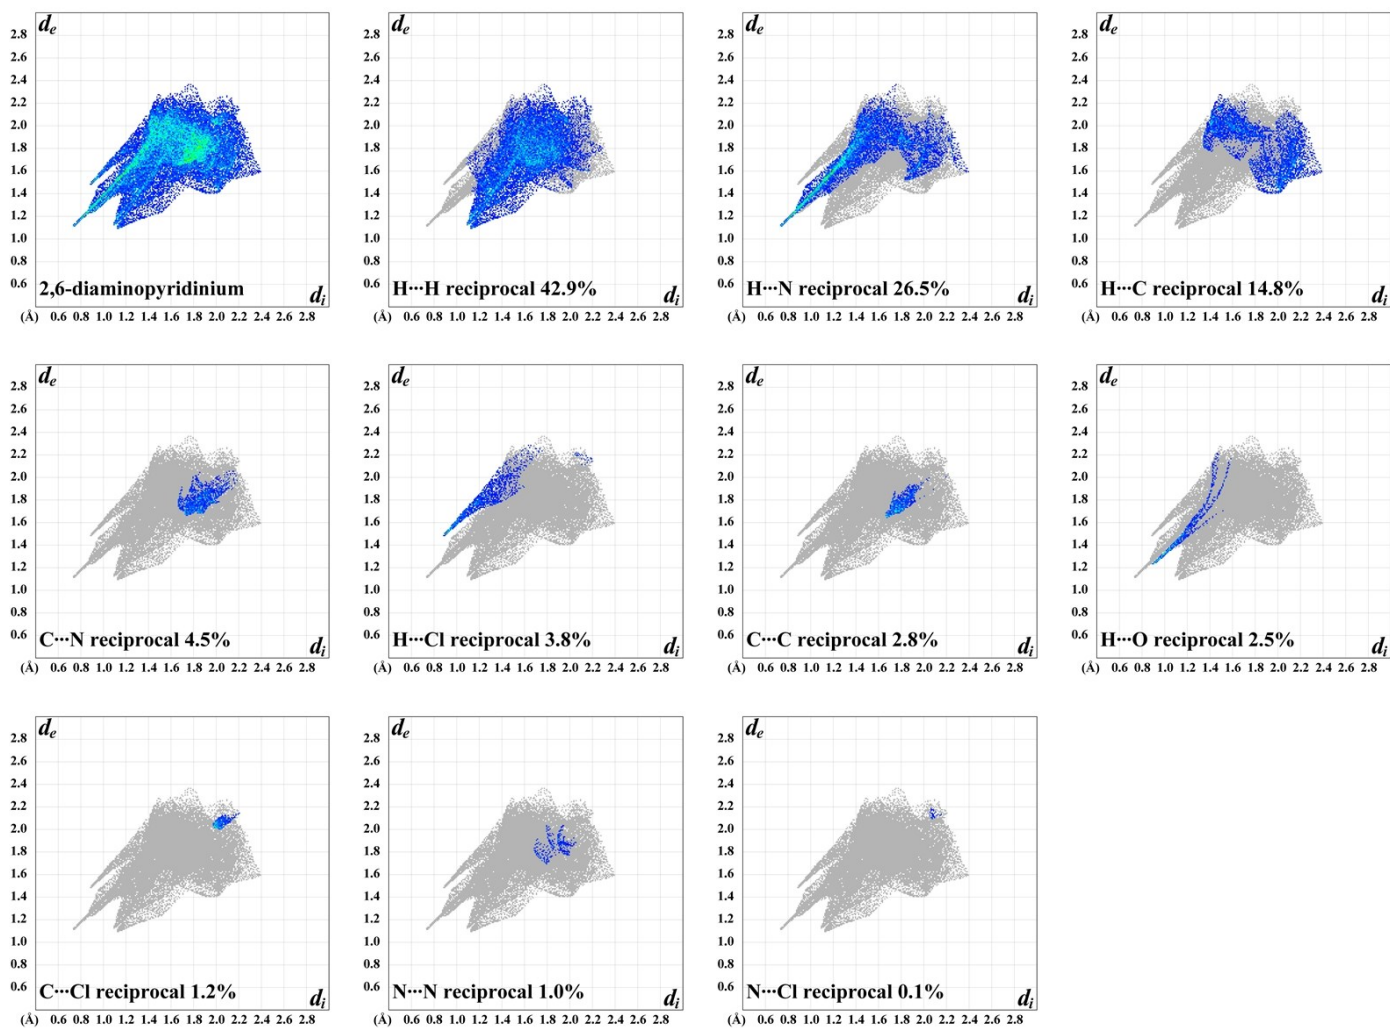

**Fig. S3** 2D fingerprint plots and decomposed 2D fingerprint plots of observed contacts for the 2,6-diaminopyridinium in the structure of **1**.

**Table S1** Selected bond lengths (Å) and angles (°) for **1**

| <i>Bond lengths</i>    |             |                         |            |                         |           |
|------------------------|-------------|-------------------------|------------|-------------------------|-----------|
| N(2)–C(3)              | 1.329(3)    | N(13)–C(14)             | 1.365(3)   | N(21)–C(22)             | 1.363(3)  |
| N(2)–C(7)              | 1.332(3)    | N(13)–C(17)             | 1.363(3)   | N(21)–C(26)             | 1.365(3)  |
| N(8)–C(3)              | 1.429(3)    | N(15)–N(16)             | 1.393(3)   | N(27)–C(22)             | 1.348(3)  |
| N(8)–C(9)              | 1.367(3)    | N(15)–C(14)             | 1.315(3)   | N(28)–C(26)             | 1.338(3)  |
| N(8)–C(12)             | 1.359(3)    | N(16)–C(17)             | 1.307(3)   | C(22)–C(23)             | 1.387(4)  |
| N(10)–N(11)            | 1.388(3)    | C(3)–C(4)               | 1.380(3)   | C(23)–C(24)             | 1.375(4)  |
| N(10)–C(9)             | 1.301(3)    | C(4)–C(5)               | 1.382(3)   | C(24)–C(25)             | 1.367(4)  |
| N(11)–C(12)            | 1.311(3)    | C(5)–C(6)               | 1.387(3)   | C(25)–C(26)             | 1.391(3)  |
| N(13)–C(7)             | 1.425(3)    | C(6)–C(7)               | 1.369(3)   |                         |           |
| <i>Bond angles</i>     |             |                         |            |                         |           |
| C(3)–N(2)–C(7)         | 116.76(19)  | N(2)–C(3)–C(4)          | 124.5(2)   | N(13)–C(17)–N(16)       | 110.1(2)  |
| C(3)–N(8)–C(9)         | 127.0(2)    | N(8)–C(3)–C(4)          | 122.0(2)   | C(22)–N(21)–C(26)       | 122.9(2)  |
| C(3)–N(8)–C(12)        | 128.90(19)  | C(3)–C(4)–C(5)          | 116.9(2)   | N(21)–C(22)–N(27)       | 117.1(2)  |
| C(9)–N(8)–C(12)        | 104.08(19)  | C(4)–C(5)–C(6)          | 120.2(2)   | N(21)–C(22)–C(23)       | 119.0(2)  |
| N(11)–N(10)–C(9)       | 107.4(2)    | C(5)–C(6)–C(7)          | 117.4(2)   | N(27)–C(22)–C(23)       | 123.9(2)  |
| N(10)–N(11)–C(12)      | 106.5(2)    | N(2)–C(7)–N(13)         | 113.03(18) | C(22)–C(23)–C(24)       | 118.3(2)  |
| C(7)–N(13)–C(14)       | 129.91(18)  | N(2)–C(7)–C(6)          | 124.3(2)   | C(23)–C(24)–C(25)       | 122.7(2)  |
| C(7)–N(13)–C(17)       | 125.41(18)  | N(13)–C(7)–C(6)         | 122.6(2)   | C(24)–C(25)–C(26)       | 118.6(2)  |
| C(14)–N(13)–C(17)      | 104.68(18)  | N(8)–C(9)–N(10)         | 110.8(2)   | N(21)–C(26)–N(28)       | 117.9(2)  |
| N(16)–N(15)–C(14)      | 105.80(18)  | N(8)–C(12)–N(11)        | 111.2(2)   | N(21)–C(26)–C(25)       | 118.6(2)  |
| N(15)–N(16)–C(17)      | 108.21(19)  | N(13)–C(14)–N(15)       | 111.21(19) | N(28)–C(26)–C(25)       | 123.5(2)  |
| N(2)–C(3)–N(8)         | 113.52(19)  |                         |            |                         |           |
| <i>Torsion angles</i>  |             |                         |            |                         |           |
| C(7)–N(2)–C(3)–N(8)    | –178.99(18) | N(10)–N(11)–C(12)–N(8)  | 0.1(3)     | C(3)–C(4)–C(5)–C(6)     | –0.6(4)   |
| C(7)–N(2)–C(3)–C(4)    | 0.4(3)      | C(14)–N(13)–C(7)–N(2)   | 172.2(2)   | C(4)–C(5)–C(6)–C(7)     | 0.4(4)    |
| C(3)–N(2)–C(7)–N(13)   | 179.49(18)  | C(14)–N(13)–C(7)–C(6)   | –7.7(4)    | C(5)–C(6)–C(7)–N(2)     | 0.3(4)    |
| C(3)–N(2)–C(7)–C(6)    | –0.7(3)     | C(17)–N(13)–C(7)–N(2)   | –7.2(3)    | C(5)–C(6)–C(7)–N(13)    | –179.9(2) |
| C(9)–N(8)–C(3)–N(2)    | 3.2(3)      | C(17)–N(13)–C(7)–C(6)   | 172.9(3)   | C(26)–N(21)–C(22)–N(27) | 179.7(3)  |
| C(9)–N(8)–C(3)–C(4)    | –176.3(3)   | C(7)–N(13)–C(14)–N(15)  | –179.6(2)  | C(26)–N(21)–C(22)–C(23) | 0.0(4)    |
| C(12)–N(8)–C(3)–N(2)   | –174.0(2)   | C(17)–N(13)–C(14)–N(15) | –0.1(3)    | C(22)–N(21)–C(26)–N(28) | 178.9(2)  |
| C(12)–N(8)–C(3)–C(4)   | 6.6(4)      | C(7)–N(13)–C(17)–N(16)  | 179.2(2)   | C(22)–N(21)–C(26)–C(25) | –0.3(4)   |
| C(3)–N(8)–C(9)–N(10)   | –178.7(2)   | C(14)–N(13)–C(17)–N(16) | –0.3(3)    | N(21)–C(22)–C(23)–C(24) | 0.1(4)    |
| C(12)–N(8)–C(9)–N(10)  | –0.9(3)     | C(14)–N(15)–N(16)–C(17) | –0.7(3)    | N(27)–C(22)–C(23)–C(24) | –179.6(3) |
| C(3)–N(8)–C(12)–N(11)  | 178.2(2)    | N(16)–N(15)–C(14)–N(13) | 0.5(3)     | C(22)–C(23)–C(24)–C(25) | 0.1(5)    |
| C(9)–N(8)–C(12)–N(11)  | 0.5(3)      | N(15)–N(16)–C(17)–N(13) | 0.6(3)     | C(23)–C(24)–C(25)–C(26) | –0.4(5)   |
| C(9)–N(10)–N(11)–C(12) | –0.7(3)     | N(2)–C(3)–C(4)–C(5)     | 0.2(4)     | C(24)–C(25)–C(26)–N(21) | 0.4(4)    |
| N(11)–N(10)–C(9)–N(8)  | 1.0(3)      | N(8)–C(3)–C(4)–C(5)     | 179.6(2)   | C(24)–C(25)–C(26)–N(28) | –178.7(3) |
